# Supplementary material for: Using a Syndemics Perspective to (Re)conceptualize Vulnerability during the COVID-19 Pandemic: A Scoping Review
Source: Preprints.org preprint supplement (doi:10.20944/preprints202406.0092.v1), 2024-06-04
Supplement: Supplementary file 3 [file Supplementary file S-2_Data extraction form.docx]

**Supplementary material 2.** Final version of the data extraction form.

| **Heading** | **Subheading** |
| --- | --- |
| General information | Journal |
| Year of publication   - 2019 - 2020 - 2021 - 2022 |
| Type of publication   - Review - Original research - Opinion pieces |
| First author |
| Affiliation(s) |
| Setting and study characteristics | Study aim(s) |
| Location |
| Data collection methods |
| Syndemic perspective | Syndemics being described |
| Type of interactions described   - Bio-Bio - Bio-Social - Bio-Socio-Environmental |
| Bio-Social interactions | Conceptualization (e.g., theoretical foundations, factors, indicators) |
| Methods (e.g., design, disciplines involved, types of data collected) |
| Bio-Socio-Environmental interactions | Conceptualization (e.g., theoretical foundations, factors, indicators) |
| Methods (e.g., design, disciplines involved, types of data collected) |
| Vulnerability perspective | Conceptualization (e.g., ceoncepts, groups, factors) |
| Recommendation | Research, policy and practice recommendations |
| Comments | Additional information to be considered by the reviewers. |
