# Supplementary figures and images for: Using a Syndemics Perspective to (Re)conceptualize Vulnerability during the COVID-19 Pandemic: A Scoping Review
Source: Preprints.org preprint supplement (doi:10.20944/preprints202406.0092.v1), 2024-06-04

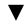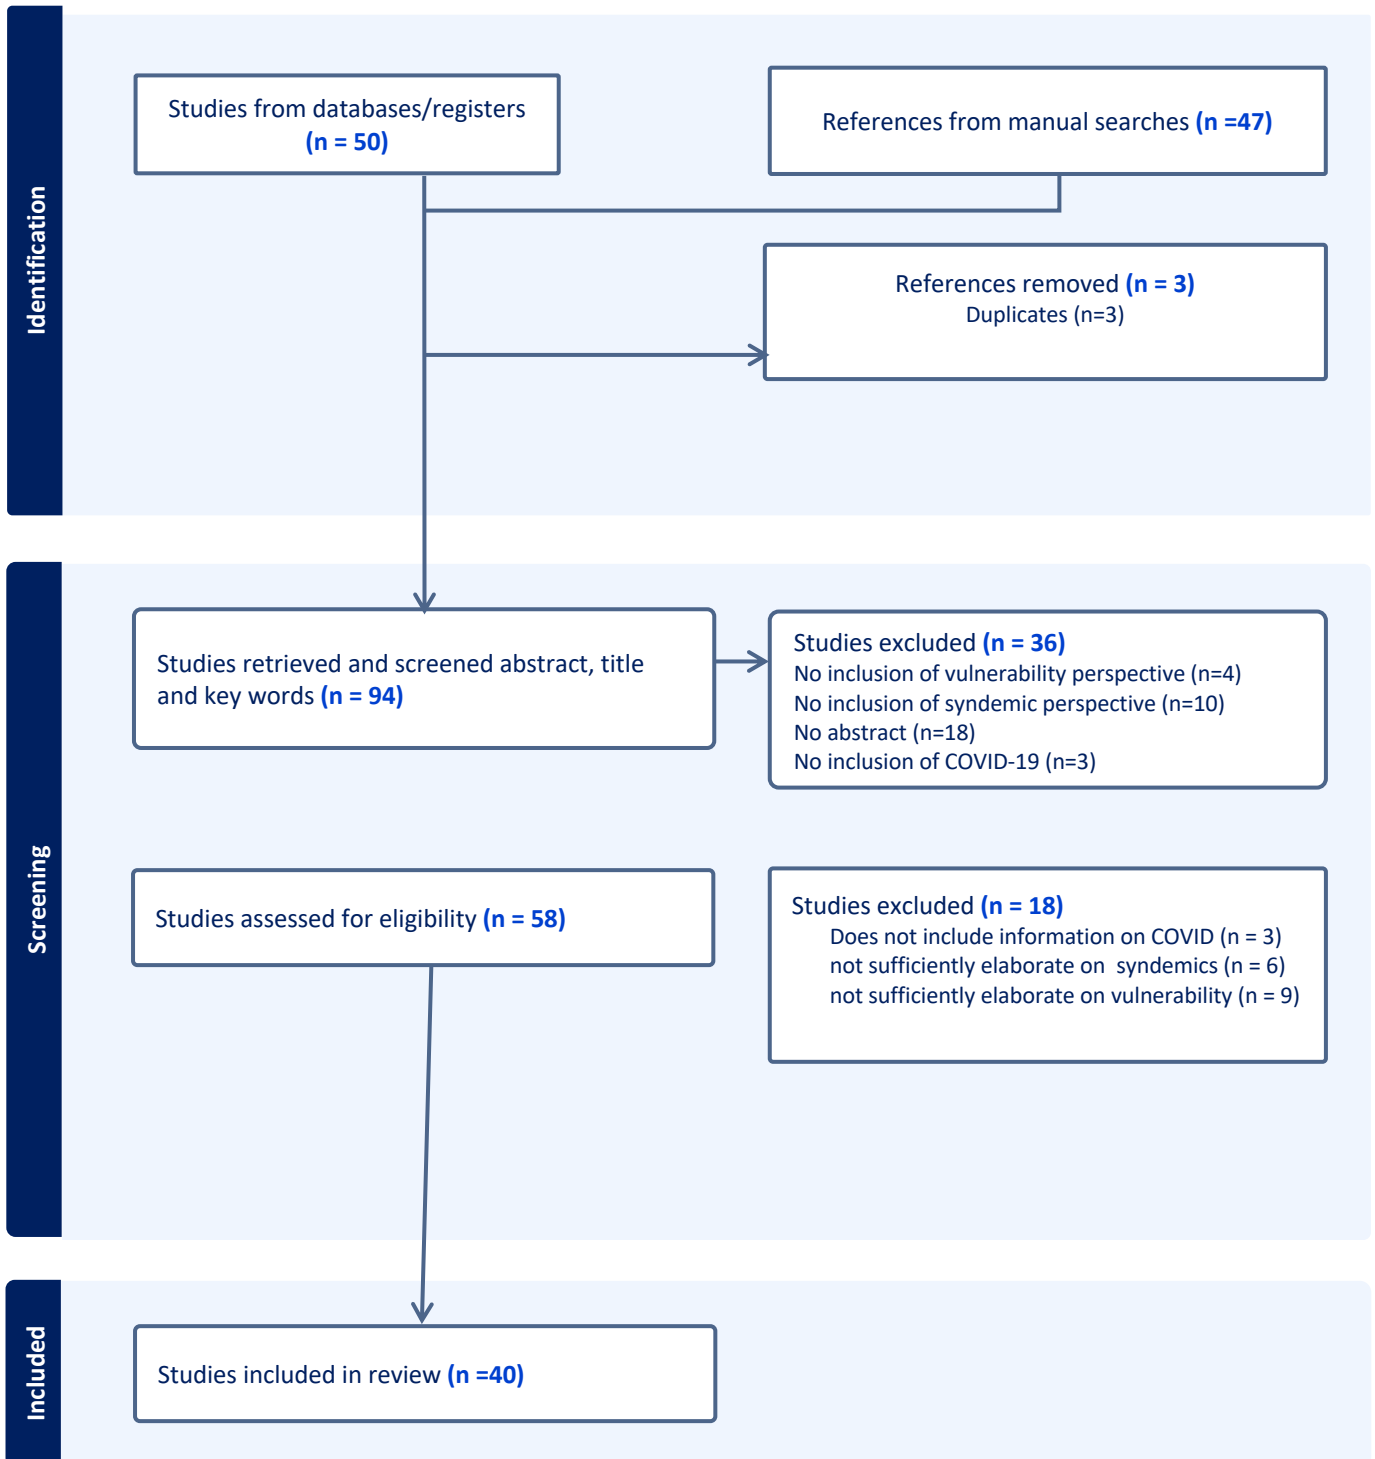

Supplement: Supplementary file 3 [file supplementary]
